# Supplementary material for: Nanosized titanium niobium oxide/carbon electrodes for lithium-ion energy storage applications
Source: Royal Society of Chemistry journal article supplement (doi:10.1039/c9se00166b), 2019-01-01
Supplement: c9se00166b1.pdf [file c9se00166b1.pdf]

## **Supplementary Information**

# **Nanosized titanium niobium oxide/carbon electrodes for lithium-ion energy storage applications**

**Hwirim Shim,<sup>1,2</sup> Eunho Lim,<sup>1</sup> Simon Fleischmann,<sup>1</sup>**

**Antje Quade,<sup>3</sup> Aura Tolosa,<sup>1</sup> Volker Presser<sup>1,2,\*</sup>**

<sup>1</sup> INM - Leibniz Institute for New Materials, 66123 Saarbrücken, Germany

<sup>2</sup> Department of Materials Science and Engineering, Saarland University, 66123 Saarbrücken, Germany

<sup>3</sup> Leibniz Institute for Plasma Science and Technology, 17489 Greifswald, Germany

\* Corresponding author's eMail: [volker.presser@leibniz-inm.de](mailto:volker.presser@leibniz-inm.de)

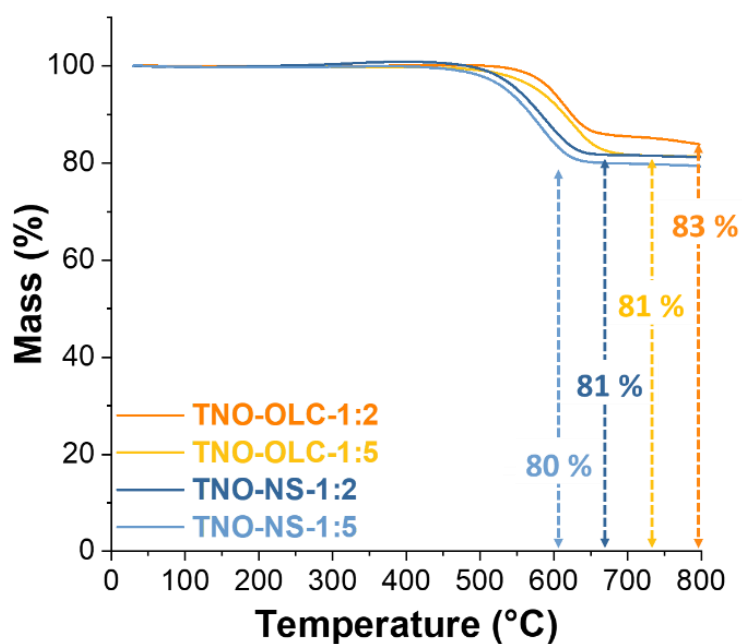

**Fig. S1:** Thermogravimetric analysis of samples under an air atmosphere for the characterization of the amount of carbon.

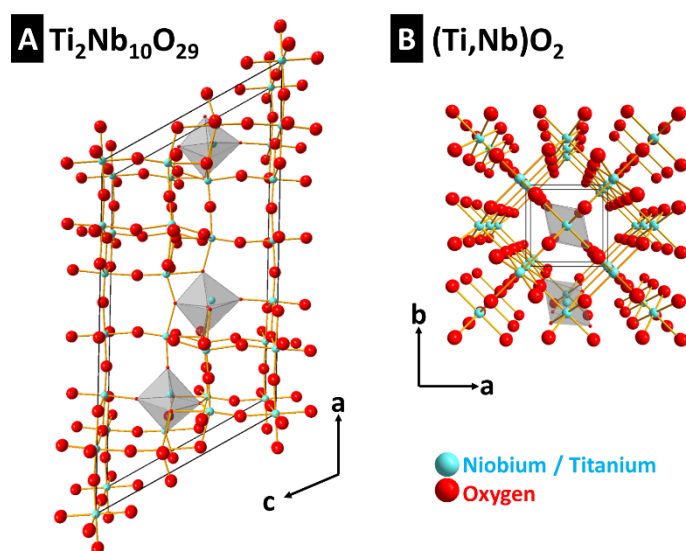

**Fig. S2:** Crystal structures of (A)  $\text{Ti}_2\text{Nb}_{10}\text{O}_{29}$  (PDF 72-0159) and (B) rutile-type  $(\text{Ti},\text{Nb})\text{O}_2$  (PDF 72-7371). Selected coordination octahedra of oxygen surrounding niobium / titanium are added for visualization purposes.

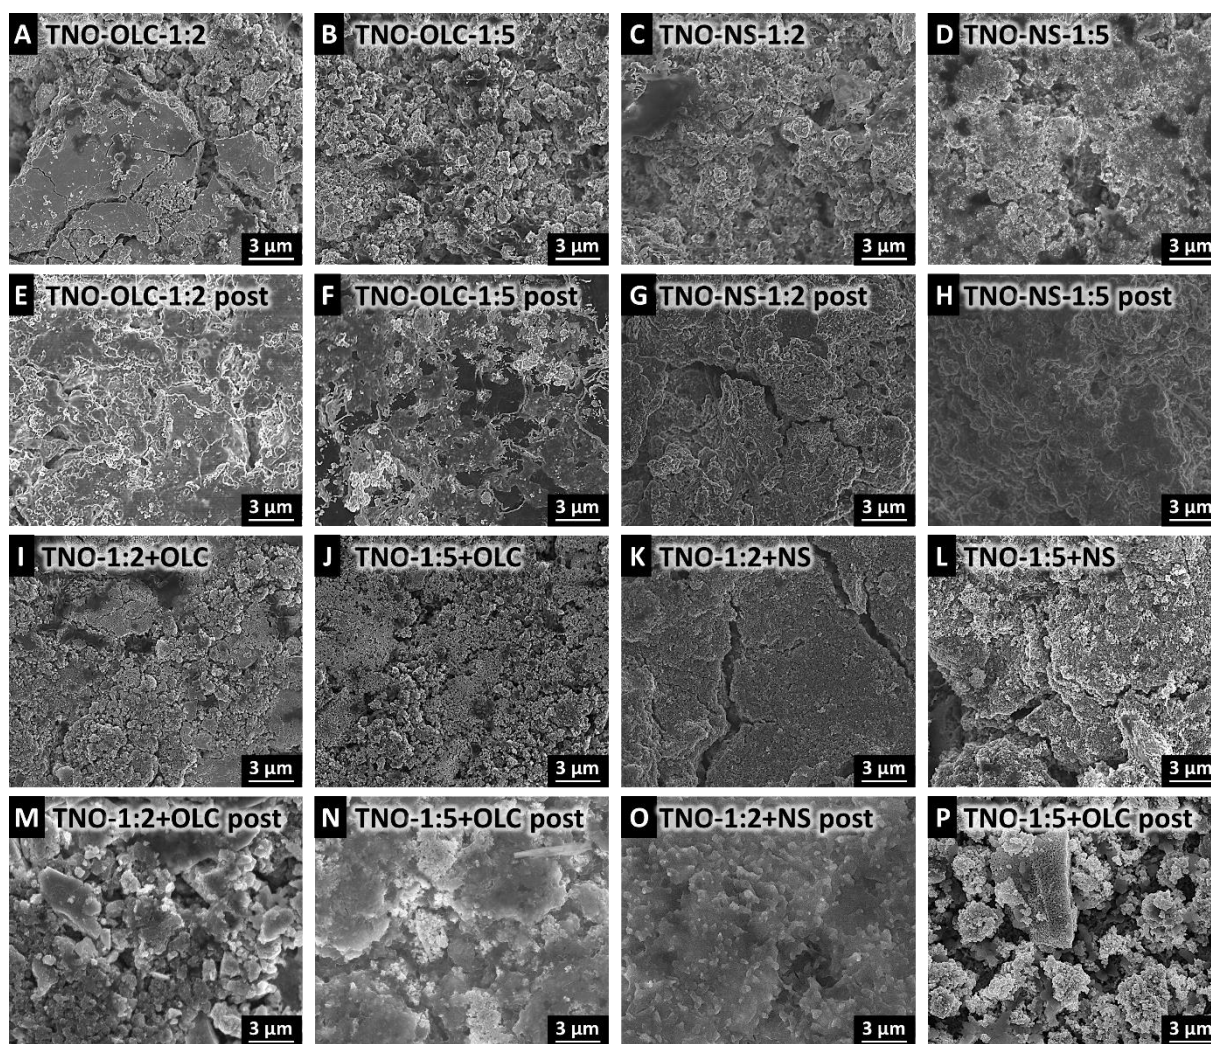

**Fig. S3:** Scanning electron micrographs of the hybrid and composite electrodes. The label “post” demarks samples that were investigated post-mortem, that is, after extended cycling.

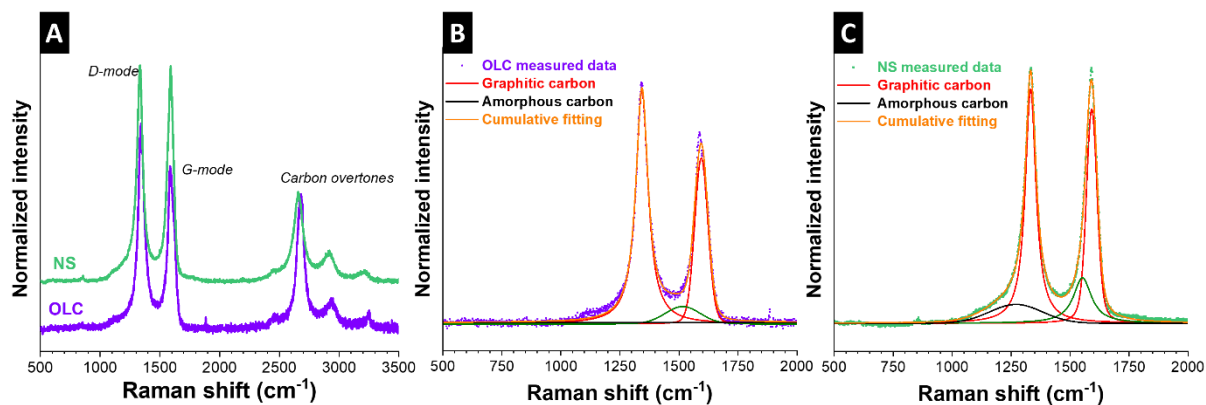

**Fig. S4:** (A) Raman spectra of carbon onions and carbon nanohorns. D- and G-mode peak fitting for (B) carbon onions and (C) carbon nanohorns.

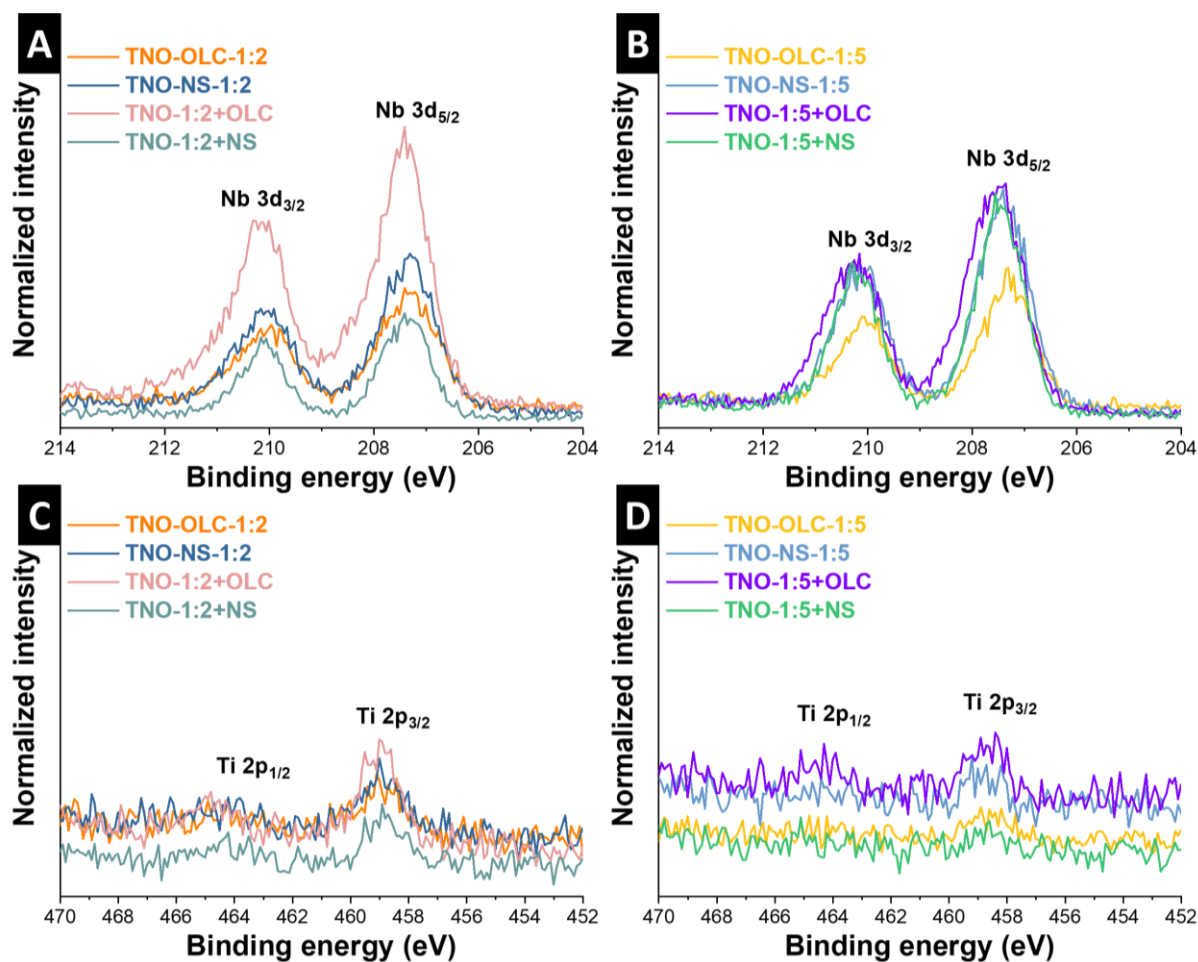

**Fig. S5:** The XPS spectra of (A-B) Nb 3d and (C-D) Ti 2p for TNO-C hybrid and TNO+C composite electrodes.

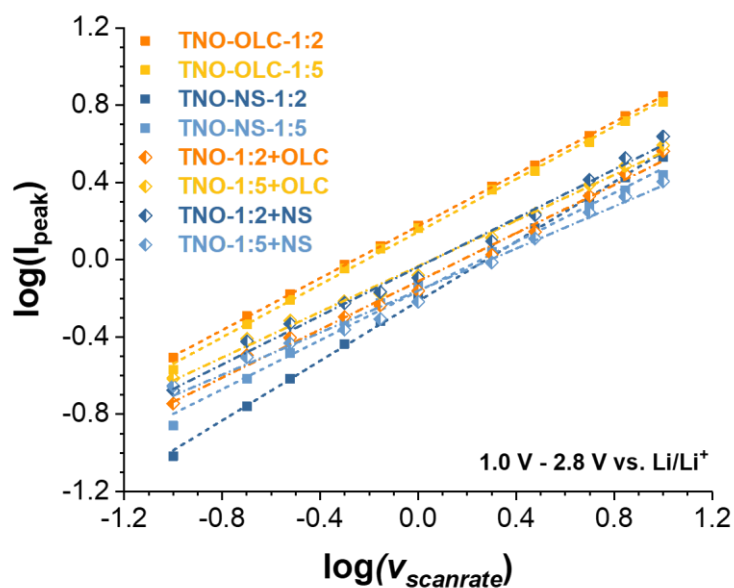

**Fig. S6:** Plot of  $\log(\text{scan rate})$  vs.  $\log(\text{peak current})$  of the lithiation (cathodic) in the potential range 1.0-2.8 V vs.  $\text{Li/Li}^+$  at scan rates of 0.1-2.0 mV/s and the linear fitting of each sample.

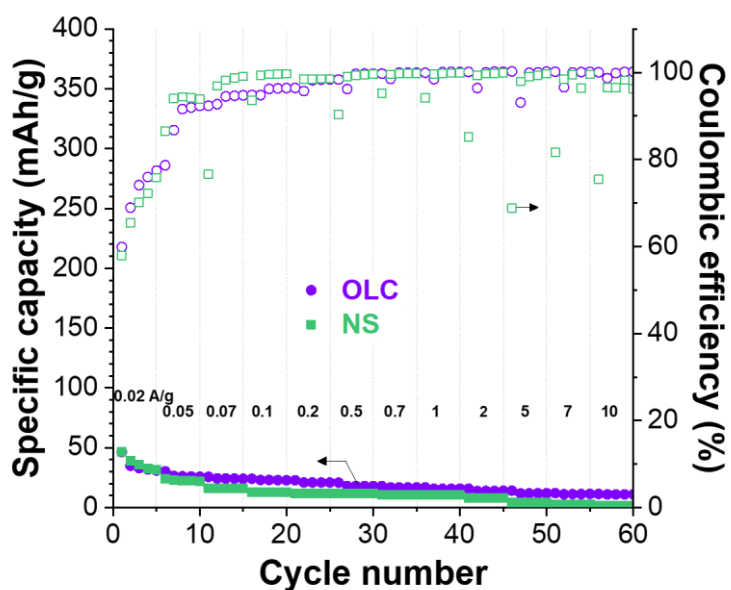

**Fig. S7:** The specific capacity of electrodes consisting of carbon onions (OLC) or carbon nanohorns (NS) obtained from galvanostatic charge/discharge cycling at different specific current for rate capability and their Coulombic efficiency between 1.0-2.8 V vs.  $\text{Li/Li}^+$ .

**Table S1:** List of the samples and their synthesis conditions according to hybridized carbon substrates.

| Carbon substrate | Ti:Nb ratio of precursor | Synthesis atmosphere | Sample name |
|------------------|--------------------------|----------------------|-------------|
| Carbon onions    | 1:2                      | Argon                | TNO-OLC-1:2 |
|                  | 1:5                      | Argon                | TNO-OLC-1:5 |
| Carbon nanohorns | 1:2                      | Argon                | TNO-NS-1:2  |
|                  | 1:5                      | Argon                | TNO-NS-1:5  |
| No carbon        | 1:2                      | Air                  | TNO-1:2     |
|                  | 1:5                      | Air                  | TNO-1:5     |
